# Supplementary material
Source: publisher figshare collection journal article supplement (https://frontiersin.figshare.com/ndownloader/files/12999200)
Supplement: Supplementary file [file 12999200]

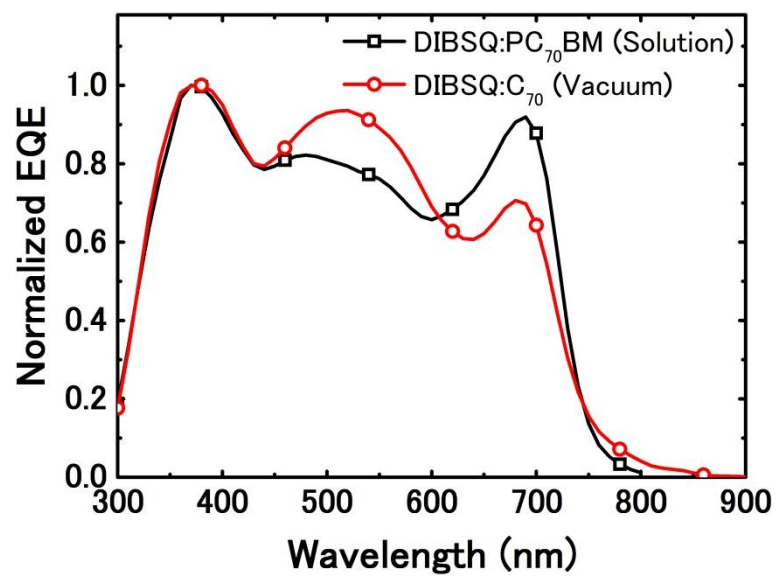

FIGURE S1 Normalized EQE spectra of the solution-processed DIBSQ:PC<sub>71</sub>BM and vacuum-processed DIBSQ:C<sub>70</sub> SMBHJ cells
